# Supplementary material for: Plasma B Vitamers: Population Epidemiology and Parent-Child Concordance in Children and Adults
Source: PubMed Central journal article supplement (PMC8001009; doi:10.3390/nu13030821), 2021-03-02
Supplement: nutrients-13-00821-s001.pdf [file nutrients-13-00821-s001.pdf]

## Supplementary material

| <b>Supplementary Table S1: List of materials</b> |                              |
|--------------------------------------------------|------------------------------|
| <b>Material</b>                                  | <b>Purchased from</b>        |
| LC-grade Acetonitrile                            | LiChrosolv (Germany)         |
| LC-grade acetic acid                             | EMSURE (Germany)             |
| Heptafluorobutyric acid (HFBA)                   | Sigma Aldrich                |
| Bovine serum albumin (BSA)                       | Sigma Aldrich                |
| Phosphate buffer saline (PBS)                    | Sigma Aldrich                |
| Ascorbic acid                                    | Scharlau Chemie (Barcelona). |
| Impact protein precipitation 96-well plate       | Phenomenex®                  |
| 96-well collection plate (square 2ml/well)       | Phenomenex®                  |
| Eppendorf tips (50, 300 and 1000µL)              | Eppendorf                    |

| <b>Supplementary Table S2: Internal standard solution composition</b> |                                   |                                  |                                         |
|-----------------------------------------------------------------------|-----------------------------------|----------------------------------|-----------------------------------------|
| <b>Internal standard</b>                                              | <b>Solvent</b>                    | <b>Target Concentration (μM)</b> | <b>Volume of internal standard (μL)</b> |
| <b>Nicotinamide-2, 4, 5, 6-d4</b>                                     | HcL 0.1 mol/L                     | 4000                             | 12.5                                    |
| <b>Pyridoxine-d2 HCl (5-Hydroxymethyl-d2)</b>                         | HcL 0.1 mol/L                     | 2500                             | 12.5                                    |
| <b>Biotin d4</b>                                                      | EtOH/water 1:1                    | 2000                             | 12.5                                    |
| <b>Thiamine hydrochloride 13C3</b>                                    | HcL 0.1 mol/L                     | 1500                             | 33.3                                    |
| <b>Riboflavin 13C4</b>                                                | H2O, Ac.ac 0.12%                  | 600                              | 41.7                                    |
| <b>Pyridoxamine d3</b>                                                | HcL 0.1 mol/L                     | 2000                             | 12.5                                    |
| <b>Pantothenic acid 13C6 15N2</b>                                     | H2O                               | 1000                             | 100                                     |
| <b>Folic acid 13C5</b>                                                | 5%NaOH 0.1mol/L, 20%EtOH in water | 500                              | 50                                      |
| <b>Nicotinic acid d4</b>                                              | HcL 0.1 mol/L                     | 2000                             | 12.5                                    |
| <b>Nicotinuric acid d4</b>                                            | HcL 0.1 mol/L                     | 2000                             | 12.5                                    |
| <b>Trimethylamine N-oxide 13C3</b>                                    | H2O                               | 2000                             | 250                                     |

**Supplementary Table S3: Calibration curve standard solution composition**

| <b>Standard</b>                           | <b>Solvent</b>                                  | <b>Target Con(<math>\mu</math>M)</b> | <b>Volume of most concentrate standard *(<math>\mu</math>L)</b> |
|-------------------------------------------|-------------------------------------------------|--------------------------------------|-----------------------------------------------------------------|
| <b>Pyridoxal 5'-phosphate monohydrate</b> | HcL 0.1 mol/L                                   | 2000                                 | 75                                                              |
| <b>Nicotinic Acid</b>                     | HcL 0.1 mol/L                                   | 4500                                 | 33.3                                                            |
| <b>4-Pyridoxic Acid</b>                   | HcL 0.1 mol/L                                   | 2000                                 | 75                                                              |
| <b>Nicotinamide</b>                       | HcL 0.1 mol/L                                   | 10000                                | 60                                                              |
| <b>FMN Riboflavin 5'-Phosphate</b>        | H <sub>2</sub> O, Ac.ac 0.12%                   | 1000                                 | 60                                                              |
| <b>Pyridoxal</b>                          | HcL 0.1 mol/L                                   | 3000                                 | 30                                                              |
| <b>Pyridoxine</b>                         | HcL 0.1 mol/L                                   | 2500                                 | 24                                                              |
| <b>Pyridoxamine</b>                       | HcL 0.1 mol/L                                   | 2300                                 | 26.1                                                            |
| <b>Riboflavin</b>                         | H <sub>2</sub> O, Ac.ac 0.12%                   | 400                                  | 75 (Dilute stock 1:2 first)                                     |
| <b>Thiamine</b>                           | HcL 0.1 mol/L                                   | 1700                                 | 35.3                                                            |
| <b>Biotin</b>                             | EtOH/water 1:1                                  | 2000                                 | 30 (Dilute stock 1 :10 first)                                   |
| <b>Pantothenic Acid</b>                   | H <sub>2</sub> O                                | 4500                                 | 133.3                                                           |
| <b>Nicotinuric Acid</b>                   | HcL 0.1 mol/L                                   | 2800                                 | 53.6                                                            |
| <b>Folic acid</b>                         | 5%NaOH 0.1mol/L,<br>20%EtOH in H <sub>2</sub> O | 1000                                 | 150                                                             |
| <b>Trimethylamine N-oxide dihydrate</b>   | H <sub>2</sub> O                                | 10000                                | 300                                                             |

*\*The most concentrated standard undergoes a serial dilution to create a calibration curve with a large dynamic range of concentrations*

| <b>Supplementary Table S4: Stock solution water dilutions</b> |            |            |            |            |            |            |            |            |            |
|---------------------------------------------------------------|------------|------------|------------|------------|------------|------------|------------|------------|------------|
| <b>Standard</b>                                               | <b>S'1</b> | <b>S'2</b> | <b>S'3</b> | <b>S'4</b> | <b>S'5</b> | <b>S'6</b> | <b>S'7</b> | <b>S'8</b> | <b>S'9</b> |
| <b>Volume of H2O <math>\mu</math>L</b>                        | 160        | 180        | 180        | 190        | 180        | 160        | 120        | 60         | no prep    |
| <b>Volume of Stock <math>\mu</math>L</b>                      | 40 of S3   | 20 of S5   | 20 of S6   | 10 of S9   | 20 of S9   | 40 of S9   | 80 of S9   | 140 of S9  |            |

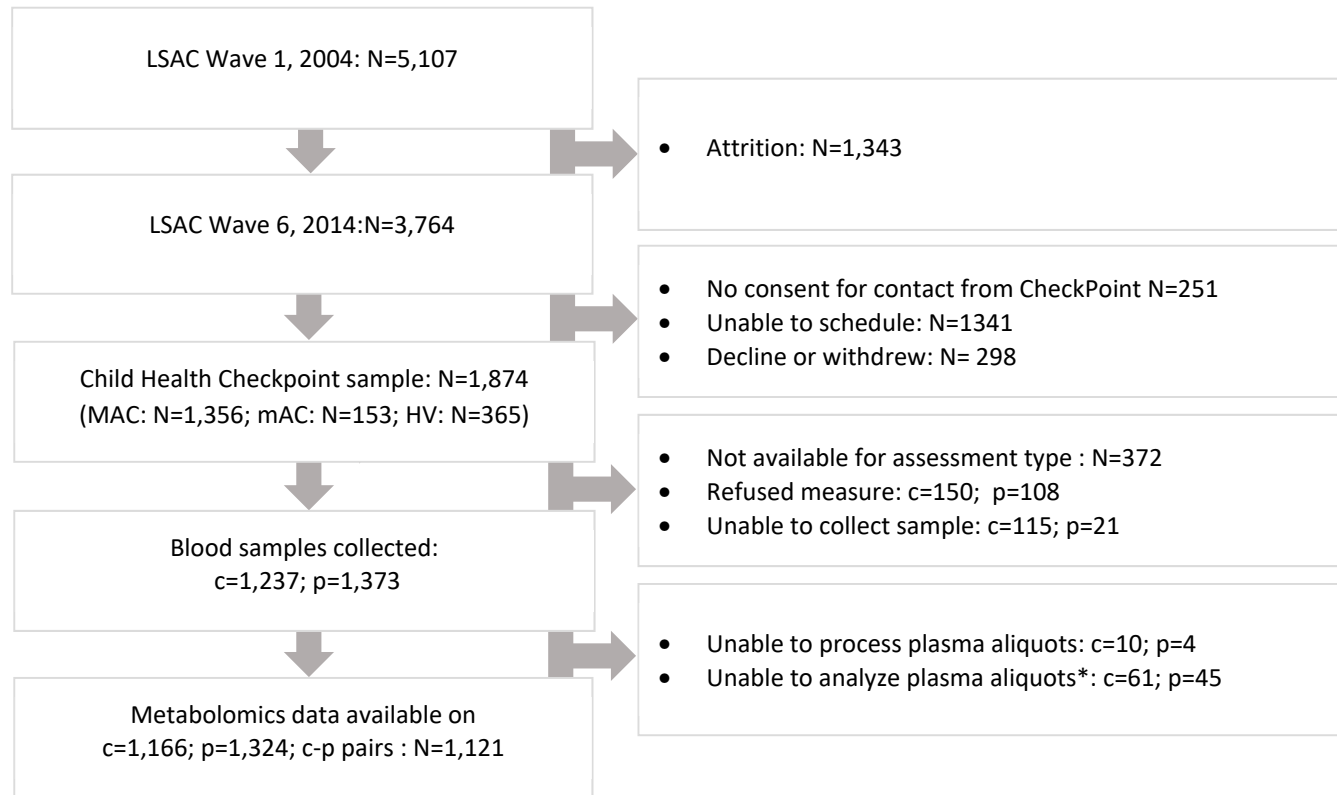

**Supplementary Figure S1: Participant flow chart.**

\*Unable to analyse due to insufficient volume or poor-quality sample. HV: home visit; LSAC: Longitudinal Study of Australian Children; MAC: main assessment centre; mAC: mini assessment centre; N: number of families; p: number of attending adults; c: number of attending children.

| <b>Supplementary Table S5: Linear model results of age-specific differences in B vitamer concentrations in the adult subgroup</b> |                 |                                                   |                |
|-----------------------------------------------------------------------------------------------------------------------------------|-----------------|---------------------------------------------------|----------------|
| <b>Vitamer*</b>                                                                                                                   | <b>Estimate</b> | <b>Adjusted R<sup>2</sup><br/>of linear model</b> | <b>p value</b> |
| <b>Thiamine (B1)</b>                                                                                                              | 0.01            | 0.002                                             | 0.07           |
| <b>Riboflavin (B2)</b>                                                                                                            | 0.01            | 0.004                                             | 0.01           |
| <b>FMN (B2)</b>                                                                                                                   | 0.001           | -0.0005                                           | 0.58           |
| <b>Nicotinamide (B3)</b>                                                                                                          | -0.002          | -0.0003                                           | 0.42           |
| <b>Pantothenic acid (B5)</b>                                                                                                      | 0.02            | 0.025                                             | <0.0001        |
| <b>4-Pyridoxic acid (B6)</b>                                                                                                      | 0.01            | 0.003                                             | 0.02           |
| <b><i>*Log transformed variables</i></b>                                                                                          |                 |                                                   |                |
